# Supplementary material
Source: PubMed Central journal article supplement (PMC6905198)
Supplement: NIHMS1058222-supplement-Supplemental_Material_2.pdf [file NIHMS1058222-supplement-Supplemental_Material_2.pdf]

Supplemental Table 1.

Results from seemingly unrelated regression (SUR) demonstrating propensity for observing intergenerational contact patterns of encouragement of healthful eating,  $b$  (SE)

|                             | Needy Generation               |                               | Downward Mediated |                               | Upward Mediated  |                  | Generational Solidarity |                 | Generational Competition       |                 |
|-----------------------------|--------------------------------|-------------------------------|-------------------|-------------------------------|------------------|------------------|-------------------------|-----------------|--------------------------------|-----------------|
|                             | Model 1                        | Model 2                       | Model 1           | Model 2                       | Model 1          | Model 2          | Model 1                 | Model 2         | Model 1                        | Model 2         |
| Intercept                   | 0.007<br>(0.06)                | -0.01<br>(0.06)               | 0.13<br>(0.08)    | 0.10<br>(0.08)                | 0.10<br>(0.06)   | 0.07<br>(0.07)   | 0.11<br>(0.12)          | 0.13<br>(0.13)  | 0.26<br>(0.09)                 | 0.26<br>(0.09)  |
| Ancestry                    |                                |                               |                   |                               |                  |                  |                         |                 |                                |                 |
| Asian                       | <b>0.10**</b><br><b>(0.03)</b> | 0.02<br>(0.06)                | 0.03<br>(0.05)    | -0.09<br>(0.08)               | 0.04<br>(0.04)   | 0.12<br>(0.07)   | 0.11<br>(0.07)          | 0.11<br>(0.13)  | <b>0.14**</b><br><b>(0.05)</b> | 0.03<br>(0.10)  |
| Italian                     | 0.04<br>(0.03)                 | <b>0.10*</b><br><b>(0.04)</b> | 0.05<br>(0.04)    | <b>0.14*</b><br><b>(0.06)</b> | 0.01<br>(0.03)   | 0.04<br>(0.05)   | -0.01<br>(0.06)         | -0.04<br>(0.09) | 0.04<br>(0.04)                 | 0.07<br>(0.06)  |
| Disease density             | 0.001<br>(0.24)                | 0.33<br>(0.36)                | -0.41<br>(0.32)   | 0.11<br>(0.47)                | 0.01<br>(0.27)   | 0.32<br>(0.42)   | 0.96<br>(0.48)          | 0.76<br>(0.77)  | -0.24<br>(0.36)                | -0.17<br>(0.56) |
| Family income               | 0.004<br>(0.006)               | 0.004<br>(0.006)              | -0.01<br>(0.009)  | -0.01<br>(0.008)              | -0.01<br>(0.007) | -0.01<br>(0.007) | 0.0008<br>(0.01)        | 0.001<br>(0.01) | 0.003<br>(0.01)                | 0.003<br>(0.01) |
| % family female             | 0.01<br>(0.06)                 | 0.02<br>(0.06)                | -0.02<br>(0.08)   | -0.01<br>(0.07)               | -0.04<br>(0.07)  | -0.03<br>(0.07)  | 0.05<br>(0.12)          | 0.04<br>(0.12)  | -0.04<br>(0.09)                | -0.04<br>(0.09) |
| Disease density by Ancestry |                                |                               |                   |                               |                  |                  |                         |                 |                                |                 |
| Asian                       |                                | 1.59<br>(1.00)                |                   | 2.30<br>(1.33)                |                  | -1.55<br>(1.17)  |                         | 0.13<br>(2.17)  |                                | 2.23<br>(1.58)  |
| Italian                     |                                | -0.78<br>(0.47)               |                   | -1.23<br>(0.62)               |                  | -0.41<br>(0.55)  |                         | 0.35<br>(1.01)  |                                | -0.37<br>(0.73) |
| Adjusted $R^2$              | 0.080                          | 0.150                         | -0.002            | 0.108                         | -0.026           | -0.028           | 0.029                   | -0.001          | 0.048                          | 0.060           |

Notes. Reference group for ancestry = Anglo-Australian. \*  $p < .05$ ; \*\*  $p < .01$ .
