# Supplementary material
Source: PubMed Central journal article supplement (PMC6905198)
Supplement: NIHMS1058222-supplement-Supplemental_Material_3.pdf [file NIHMS1058222-supplement-Supplemental_Material_3.pdf]

Table 2.

*Results from seemingly unrelated Regression (SUR) demonstrating propensity for observing intergenerational contact patterns of encouragement of healthful eating, controlling for number of generations*

|                             | Sandwich Generation             |                                | Downward-Skipped |                 | Upward-Skipped  |                  | Intergenerational Solidarity    |                   |
|-----------------------------|---------------------------------|--------------------------------|------------------|-----------------|-----------------|------------------|---------------------------------|-------------------|
|                             | Model 1                         | Model 2                        | Model 1          | Model 2         | Model 1         | Model 2          | Model 1                         | Model 2           |
| Intercept                   | 0.05<br>(0.13)                  | 0.02<br>(0.07)                 | -0.05<br>(0.16)  | -0.09<br>(0.27) | 0.21<br>(0.24)  | 0.14<br>(0.25)   | 0.05<br>(0.05)                  | 0.03<br>(0.05)    |
| Ancestry                    |                                 |                                |                  |                 |                 |                  |                                 |                   |
| Asian                       | <b>0.19***</b><br><b>(0.04)</b> | 0.11<br>(0.07)                 | 0.14<br>(0.08)   | 0.21<br>(0.16)  | 0.03<br>(0.13)  | -0.01<br>(0.25)  | <b>0.10***</b><br><b>(0.03)</b> | 0.03<br>(0.05)    |
| Italian                     | 0.01<br>(0.03)                  | <b>0.11*</b><br><b>(0.05)</b>  | -0.03<br>(0.07)  | 0.04<br>(0.11)  | -0.02<br>(0.11) | 0.18<br>(0.17)   | -0.003<br>(0.02)                | 0.04<br>(0.03)    |
| Disease density             | -0.09<br>(0.29)                 | 0.55<br>(0.43)                 | 0.61<br>(0.60)   | 1.11<br>(0.93)  | 0.07<br>(0.92)  | 1.55<br>(1.45)   | 0.02<br>(0.19)                  | 0.26<br>(0.28)    |
| Three generation            | 0.02<br>(0.05)                  | 0.008<br>(0.05)                | 0.03<br>(0.11)   | 0.05<br>(0.10)  | 0.05<br>(0.17)  | 0.03<br>(0.17)   | 0.02<br>(0.03)                  | 0.02<br>(0.03)    |
| Family income               | -0.005<br>(0.008)               | -0.005<br>(0.007)              | 0.007<br>(0.02)  | 0.003<br>(0.02) | 0.01<br>(0.02)  | -0.009<br>(0.02) | -0.005<br>(0.005)               | -0.005<br>(0.005) |
| % family female             | 0.03<br>(0.07)                  | 0.05<br>(0.21)                 | 0.10<br>(0.15)   | 0.16<br>(0.46)  | -0.18<br>(0.24) | -0.13<br>(0.24)  | -0.01<br>(0.05)                 | -0.007<br>(0.05)  |
| Disease density by Ancestry |                                 |                                |                  |                 |                 |                  |                                 |                   |
| Asian                       |                                 | 1.53<br>(1.18)                 |                  | -1.20<br>(2.65) |                 | 0.89<br>(4.01)   |                                 | 1.19<br>(0.79)    |
| Italian                     |                                 | <b>-1.34*</b><br><b>(0.55)</b> |                  | -0.98<br>(1.24) |                 | -2.78<br>(1.88)  |                                 | -0.58<br>(0.37)   |
| Adjusted $R^2$              | 0.222                           | 0.312                          | -0.015           | 0.081           | -0.072          | -0.061           | 0.125                           | 0.186             |

Notes. Reference group for ancestry = Anglo-Australian. McElroy  $R^2$  for the system of models (i.e., all encouragement patterns) equaled 0.116 for Model 1 and 0.178 for Model 2.

\*  $p < .05$ ; \*\*  $p < .01$ ; \*\*\*  $p < .001$
