# Supplementary material
Source: PubMed Central journal article supplement (PMC6905198)
Supplement: NIHMS1058222-supplement-Supplemental_Material_4.pdf [file NIHMS1058222-supplement-Supplemental_Material_4.pdf]

Supplemental Table 3.

*Residuals covariance/correlation matrix from final fitted model*

|                                 | 1     | 2    | 3     | 4     | 5     | 6     | 7    | 8    | 9    |
|---------------------------------|-------|------|-------|-------|-------|-------|------|------|------|
| 1. Sandwich Generation          | 0.01  | 0.00 | 0.00  | 0.00  | 0.01  | 0.00  | 0.01 | 0.00 | 0.00 |
| 2. Needy Generation             | 0.50  | 0.01 | 0.00  | 0.00  | 0.00  | 0.01  | 0.00 | 0.00 | 0.01 |
| 3. Downward-Mediated Flow       | 0.31  | 0.07 | 0.01  | 0.00  | -0.01 | -0.01 | 0.00 | 0.01 | 0.00 |
| 4. Upward-Mediated Flow         | -0.01 | 0.17 | 0.27  | 0.01  | 0.00  | 0.00  | 0.00 | 0.00 | 0.00 |
| 5. Downward-Skipped Generation  | 0.48  | 0.15 | -0.22 | 0.01  | 0.05  | 0.00  | 0.00 | 0.00 | 0.00 |
| 6. Upward-Skipped Generation    | 0.12  | 0.44 | -0.22 | -0.15 | 0.01  | 0.11  | 0.00 | 0.00 | 0.00 |
| 7. Intergenerational Solidarity | 0.85  | 0.48 | 0.35  | 0.10  | 0.34  | 0.15  | 0.00 | 0.00 | 0.00 |
| 8. Generational Solidarity      | 0.10  | 0.15 | 0.43  | 0.15  | -0.12 | -0.05 | 0.16 | 0.03 | 0.00 |
| 9. Generational Competition     | 0.37  | 0.52 | 0.31  | 0.09  | 0.14  | 0.08  | 0.33 | 0.17 | 0.02 |

Notes. The covariances are shown above the diagonal and the correlations are shown below the diagonal. On the diagonal are the variances.
